# Supplementary material
Source: PubMed Central journal article supplement (PMC5286936)
Supplement: 2016_147694-Disclosures_and_Contributions.pdf [file 2016_147694-Disclosures_and_Contributions.pdf]

Haematologica  
HAEMATOL/2016/147694  
Version 4

Germline variants in ETV6 underlie reduced platelet formation, platelet dysfunction and increased levels of circulating CD34+ progenitors

Marjorie Poggi, Matthias Canault, Marie Favier, Ernest Turro, Paul Saultier, Dorsaf Ghalloussi, Veronique Baccini, Lea Vidal, Anna Mezzapesa, Nadjim Chelghoum, Badreddine Mohand-Oumoussa, Céline Falaise, Rémi Favier, Willem H. Ouwehand, Mathieu Fiore, Franck Peiretti, Pierre Emmanuel Morange, Noémie Saut, Denis Bernot, Andreas Greinacher, Alan T. Nurden, Paquita Nurden, Kathleen Freson, David-Alexandre Trégouët, Hana Raslova, and Marie-Christine Alessi

Disclosures: None of the authors of the manuscript has conflict of interest to disclose.

Contributions: M.P. and M.C. designed and performed experiments, analyzed data, and wrote the paper; M.F., P.S., D.G., V.B., D.B., LV., A.M., F.P. and N.S. performed experiments; HR designed and performed experiments with lentivirus and megakaryocyte differentiation; N.C., B.M.O., D.A.T.,E.T and W.H.O. performed genetic and bioinformatic analysis; C.F., R.F., M.Fi., K.F, A.G. and P.E.M. performed patient clinical characterization; A.T.N and P.N. scientific advices and manuscript correction; M.C.A supervised the experiments, and wrote the paper.
